# Supplementary material for: Burnout among midwives—the factorial structure of the burnout assessment tool and an assessment of burnout levels in a Swedish national sample
Source: Springer Nature journal article supplement (doi:10.1186/s12913-022-08552-8), 2022-09-16
Supplement: MOESM1 [file 23504652]

## Supplementary file 1 – Swedish version of the Burnout Assessment Tool

### Arbetsrelaterad version av BAT

#### Instruktion

Följande påståenden handlar om din arbetsituation och hur du upplever denna situation. Vänligen ange hur ofta varje påstående gäller för dig.

#### Skattning

| Aldrig | Sällan | Ibland | Ofta | Alltid |
|--------|--------|--------|------|--------|
| 1      | 2      | 3      | 4    | 5      |

#### Primära symptom

|                                                                                         | Aldrig                   | Sällan                   | Ibland                   | Ofta                     | Alltid                   |
|-----------------------------------------------------------------------------------------|--------------------------|--------------------------|--------------------------|--------------------------|--------------------------|
| <b>Utmattning</b>                                                                       |                          |                          |                          |                          |                          |
| 1. När jag är på arbetet känner jag mig psykiskt utmattad*                              | <input type="checkbox"/> | <input type="checkbox"/> | <input type="checkbox"/> | <input type="checkbox"/> | <input type="checkbox"/> |
| 2. Allting jag gör på arbetet kräver stor ansträngning                                  | <input type="checkbox"/> | <input type="checkbox"/> | <input type="checkbox"/> | <input type="checkbox"/> | <input type="checkbox"/> |
| 3. Det är svårt för mig att återhämta mig efter en dag på arbetet*                      | <input type="checkbox"/> | <input type="checkbox"/> | <input type="checkbox"/> | <input type="checkbox"/> | <input type="checkbox"/> |
| 4. När jag är på arbetet känner jag mig fysiskt utmattad*                               | <input type="checkbox"/> | <input type="checkbox"/> | <input type="checkbox"/> | <input type="checkbox"/> | <input type="checkbox"/> |
| 5. Jag saknar energi för en ny dag på arbetet när jag går upp på morgonen               | <input type="checkbox"/> | <input type="checkbox"/> | <input type="checkbox"/> | <input type="checkbox"/> | <input type="checkbox"/> |
| 6. Jag vill vara aktiv på arbetet men trots det klarar jag inte av det                  | <input type="checkbox"/> | <input type="checkbox"/> | <input type="checkbox"/> | <input type="checkbox"/> | <input type="checkbox"/> |
| 7. När jag anstränger mig på arbetet blir jag trött fortare än vanligt                  | <input type="checkbox"/> | <input type="checkbox"/> | <input type="checkbox"/> | <input type="checkbox"/> | <input type="checkbox"/> |
| 8. Vid arbetsdagens slut känner jag mig psykiskt utmattad och slutkörd                  | <input type="checkbox"/> | <input type="checkbox"/> | <input type="checkbox"/> | <input type="checkbox"/> | <input type="checkbox"/> |
| <b>Känslomässig distansering</b>                                                        |                          |                          |                          |                          |                          |
| 9. Jag får kämpa för att uppbringa entusiasm för mitt arbete*                           | <input type="checkbox"/> | <input type="checkbox"/> | <input type="checkbox"/> | <input type="checkbox"/> | <input type="checkbox"/> |
| 10. När jag är på arbetet går jag på autopilot och tänker inte på vad jag håller på med | <input type="checkbox"/> | <input type="checkbox"/> | <input type="checkbox"/> | <input type="checkbox"/> | <input type="checkbox"/> |
| 11. Jag känner stark motvilja för mitt arbete*                                          | <input type="checkbox"/> | <input type="checkbox"/> | <input type="checkbox"/> | <input type="checkbox"/> | <input type="checkbox"/> |

- |                                                                              |                          |                          |                          |                          |                          |
|------------------------------------------------------------------------------|--------------------------|--------------------------|--------------------------|--------------------------|--------------------------|
| 12. Jag känner likgiltighet inför mitt arbete                                | <input type="checkbox"/> | <input type="checkbox"/> | <input type="checkbox"/> | <input type="checkbox"/> | <input type="checkbox"/> |
| 13. Jag känner mig cynisk inför vad mitt arbete har för betydelse för andra* | <input type="checkbox"/> | <input type="checkbox"/> | <input type="checkbox"/> | <input type="checkbox"/> | <input type="checkbox"/> |

|                                                                                 | Aldrig                   | Sällan                   | Ibland                   | Ofta                     | Alltid                   |
|---------------------------------------------------------------------------------|--------------------------|--------------------------|--------------------------|--------------------------|--------------------------|
| <b>Kognitiv nedsättning</b>                                                     |                          |                          |                          |                          |                          |
| 14. På arbetet har jag svårt att vara fokuserad*                                | <input type="checkbox"/> | <input type="checkbox"/> | <input type="checkbox"/> | <input type="checkbox"/> | <input type="checkbox"/> |
| 15. På arbetet har jag svårt att tänka klart                                    | <input type="checkbox"/> | <input type="checkbox"/> | <input type="checkbox"/> | <input type="checkbox"/> | <input type="checkbox"/> |
| 16. Jag är glömsk och distraherad på arbetet                                    | <input type="checkbox"/> | <input type="checkbox"/> | <input type="checkbox"/> | <input type="checkbox"/> | <input type="checkbox"/> |
| 17. När jag arbetar har jag svårt att koncentrera mig*                          | <input type="checkbox"/> | <input type="checkbox"/> | <input type="checkbox"/> | <input type="checkbox"/> | <input type="checkbox"/> |
| 18. Jag gör misstag på arbetet eftersom jag tänker på annat*                    | <input type="checkbox"/> | <input type="checkbox"/> | <input type="checkbox"/> | <input type="checkbox"/> | <input type="checkbox"/> |
| <b>Nedsatt känsloreglering</b>                                                  |                          |                          |                          |                          |                          |
| 19. På arbetet känner jag mig oförmögen att kontrollera mina känslor*           | <input type="checkbox"/> | <input type="checkbox"/> | <input type="checkbox"/> | <input type="checkbox"/> | <input type="checkbox"/> |
| 20. Jag känner inte igen mig själv i hur jag reagerar känslomässigt på arbetet* | <input type="checkbox"/> | <input type="checkbox"/> | <input type="checkbox"/> | <input type="checkbox"/> | <input type="checkbox"/> |
| 21. När jag arbetar blir jag lätt irriterad när saker inte går som jag vill     | <input type="checkbox"/> | <input type="checkbox"/> | <input type="checkbox"/> | <input type="checkbox"/> | <input type="checkbox"/> |
| 22. Jag blir upprörd eller ledsen på arbetet utan att veta varför               | <input type="checkbox"/> | <input type="checkbox"/> | <input type="checkbox"/> | <input type="checkbox"/> | <input type="checkbox"/> |
| 23. På arbetet händer det att jag överreagerar utan att mena det*               | <input type="checkbox"/> | <input type="checkbox"/> | <input type="checkbox"/> | <input type="checkbox"/> | <input type="checkbox"/> |

Observera: \* = Kort version

### Sekundära symptom

|                                                                        | Aldrig                   | Sällan                   | Ibland                   | Ofta                     | Alltid                   |
|------------------------------------------------------------------------|--------------------------|--------------------------|--------------------------|--------------------------|--------------------------|
| <b>Psykisk påfrestning</b>                                             |                          |                          |                          |                          |                          |
| 1. Jag har svårt att somna eller fortsätta sova när jag väl har somnat | <input type="checkbox"/> | <input type="checkbox"/> | <input type="checkbox"/> | <input type="checkbox"/> | <input type="checkbox"/> |
| 2. Jag oroar mig lätt                                                  | <input type="checkbox"/> | <input type="checkbox"/> | <input type="checkbox"/> | <input type="checkbox"/> | <input type="checkbox"/> |
| 3. Jag känner mig spänd och stressad                                   | <input type="checkbox"/> | <input type="checkbox"/> | <input type="checkbox"/> | <input type="checkbox"/> | <input type="checkbox"/> |
| 4. Jag känner mig ängslig och/eller lider av panikattacker             | <input type="checkbox"/> | <input type="checkbox"/> | <input type="checkbox"/> | <input type="checkbox"/> | <input type="checkbox"/> |
| 5. Jag blir störd av mycket folk och ljud                              | <input type="checkbox"/> | <input type="checkbox"/> | <input type="checkbox"/> | <input type="checkbox"/> | <input type="checkbox"/> |
| <b>Psykosomatiska besvär</b>                                           |                          |                          |                          |                          |                          |
| 6. Jag lider av hjärtklappning eller bröstsmärtor                      | <input type="checkbox"/> | <input type="checkbox"/> | <input type="checkbox"/> | <input type="checkbox"/> | <input type="checkbox"/> |
| 7. Jag lider av mag- och/eller tarmbesvär                              | <input type="checkbox"/> | <input type="checkbox"/> | <input type="checkbox"/> | <input type="checkbox"/> | <input type="checkbox"/> |
| 8. Jag lider av huvudvärk                                              | <input type="checkbox"/> | <input type="checkbox"/> | <input type="checkbox"/> | <input type="checkbox"/> | <input type="checkbox"/> |
| 9. Jag lider av muskelsmärter, t.ex. i nacken, skuldrorna eller ryggen | <input type="checkbox"/> | <input type="checkbox"/> | <input type="checkbox"/> | <input type="checkbox"/> | <input type="checkbox"/> |
| 10. Jag blir ofta sjuk                                                 | <input type="checkbox"/> | <input type="checkbox"/> | <input type="checkbox"/> | <input type="checkbox"/> | <input type="checkbox"/> |
