# Supplementary material for: Burnout among midwives—the factorial structure of the burnout assessment tool and an assessment of burnout levels in a Swedish national sample
Source: Springer Nature journal article supplement (doi:10.1186/s12913-022-08552-8), 2022-09-16
Supplement: MOESM2 [file 23504652]

## Supplementary file 2 – Frequency distribution of the item responses on the Burnout Assessment Tool in Swedish Midwives

**Supplementary table 1** Percent (%) and count (n) of items responses on the Burnout Assessment Tool in Swedish Midwives (n=1664).

| Item | Never       | Rarely     | Sometimes  | Often      | Always   |
|------|-------------|------------|------------|------------|----------|
|      | % (n)       | % (n)      | % (n)      | % (n)      | % (n)    |
| EX1  | 13,1 (218)  | 34,7 (578) | 34,6 (575) | 16,5 (275) | 1,1 (18) |
| EX2  | 5,2 (87)    | 23,9 (398) | 39,9 (664) | 26,6 (442) | 4,4 (73) |
| EX3  | 9,5 (158)   | 32,1 (534) | 37,3 (620) | 17,4 (290) | 3,7 (62) |
| EX4  | 22,7 (378)  | 39,8 (662) | 28,7 (477) | 8,2 (136)  | 0,7 (11) |
| EX5  | 12,7 (211)  | 35,7 (594) | 34,3 (570) | 14,4 (240) | 2,9 (49) |
| EX6  | 32,9 (548)  | 43,1 (718) | 18 (300)   | 5,2 (86)   | 0,7 (12) |
| EX7  | 24,5 (408)  | 37,3 (621) | 25,2 (419) | 11,2 (186) | 1,8 (30) |
| EX8  | 7,6 (127)   | 28,7 (478) | 36,1 (601) | 22,7 (377) | 4,9 (81) |
| MD1  | 22 (366)    | 43,7 (727) | 24,9 (415) | 7,9 (132)  | 1,4 (24) |
| MD2  | 38,8 (646)  | 38,6 (642) | 17,4 (289) | 4,8 (80)   | 0,4 (7)  |
| MD3  | 63,5 (1057) | 25,5 (425) | 8,5 (141)  | 2,2 (37)   | 0,2 (4)  |
| MD4  | 64,8 (1078) | 23,9 (398) | 8,7 (145)  | 2,5 (41)   | 0,1 (2)  |
| MD5  | 69,4 (1155) | 20,4 (340) | 8,1 (134)  | 2 (34)     | 0,1 (1)  |
| CI1  | 21,4 (356)  | 50,6 (842) | 24,8 (413) | 3 (50)     | 0,2 (3)  |
| CI2  | 25,4 (422)  | 48,7 (811) | 23,6 (392) | 2,3 (38)   | 0,1 (1)  |
| CI3  | 22,1 (367)  | 48,6 (809) | 24,5 (407) | 4,5 (75)   | 0,4 (6)  |
| CI4  | 22,7 (378)  | 52,2 (868) | 22,1 (367) | 2,9 (49)   | 0,1 (2)  |
| CI5  | 41,3 (687)  | 52,2 (869) | 6,1 (102)  | 0,3 (5)    | 0,1 (1)  |
| EI1  | 48,5 (807)  | 44,1 (733) | 7 (117)    | 0,4 (6)    | 0,1 (1)  |
| EI2  | 57,2 (951)  | 32,7 (544) | 8,3 (138)  | 1,6 (26)   | 0,3 (5)  |
| EI3  | 29,7 (494)  | 46,8 (779) | 19,9 (331) | 3,5 (58)   | 0,1 (2)  |
| EI4  | 62,7 (1043) | 28,2 (469) | 8,1 (135)  | 1 (16)     | 0,1 (1)  |
| EI5  | 55,1 (917)  | 36,2 (602) | 7,8 (129)  | 0,8 (14)   | 0,1 (2)  |
