# Supplementary material for: Burnout among midwives—the factorial structure of the burnout assessment tool and an assessment of burnout levels in a Swedish national sample
Source: Springer Nature journal article supplement (doi:10.1186/s12913-022-08552-8), 2022-09-16
Supplement: MOESM3 [file 23504652]

## Supplementary file 3 – Differential item functioning (DIF) for age

**Supplementary table 2** Analysis of variance of residuals for test of DIF between age groups (under/above median age of 47) based on data from representative sample of Swedish midwives, subsample 1 n=800. Bonferroni adjusted significance level: 0.000145.

| <b>Item</b> | <b>MS</b> | <b>F</b> | <b>DF</b> | <b>Prob</b> |
|-------------|-----------|----------|-----------|-------------|
| EX1         | 8.37      | 10.25    | 1         | 0.0014      |
| EX2         | 0.39      | 0.29     | 1         | 0.5890      |
| EX3         | 1.05      | 1.16     | 1         | 0.2808      |
| EX4         | 1.74      | 1.85     | 1         | 0.1738      |
| EX5         | 1.66      | 1.90     | 1         | 0.1681      |
| EX6         | 1.11      | 1.66     | 1         | 0.1973      |
| EX7         | 1.01      | 1.19     | 1         | 0.2758      |
| EX8         | 2.52      | 2.92     | 1         | 0.0881      |
| MD1         | 2.03      | 2.33     | 1         | 0.1277      |
| MD2         | 6.81      | 5.47     | 1         | 0.0196      |
| MD3         | 0.69      | 0.73     | 1         | 0.3922      |
| MD4         | 3.06      | 2.56     | 1         | 0.1100      |
| MD5         | 0.05      | 0.03     | 1         | 0.8560      |
| CI1         | 6.90      | 8.34     | 1         | 0.0040      |
| CI2         | 3.58      | 4.64     | 1         | 0.0315      |
| CI3         | 0.77      | 0.85     | 1         | 0.3561      |
| CI4         | 0.89      | 1.12     | 1         | 0.2912      |
| CI5         | 0.77      | 0.75     | 1         | 0.3878      |
| EI1         | 2.54      | 2.46     | 1         | 0.1169      |
| EI2         | 0.50      | 0.62     | 1         | 0.4318      |
| EI3         | 0.10      | 0.09     | 1         | 0.7642      |
| EI4         | 0.63      | 0.88     | 1         | 0.3491      |
| EI5         | 13.11     | 11.78    | 1         | 0.0006      |
