# Supplementary material for: Burnout among midwives—the factorial structure of the burnout assessment tool and an assessment of burnout levels in a Swedish national sample
Source: Springer Nature journal article supplement (doi:10.1186/s12913-022-08552-8), 2022-09-16
Supplement: MOESM4 [file 23504652]

## Supplementary file 4 – Observed residual correlation matrix

**Supplementary table 3** Observed residual correlation table for the Burnout Assessment Tool in Swedish midwives, subsample 1 n=800.

| Item | EX1  | EX2  | EX3  | EX4  | EX5  | EX6  | EX7  | EX8  | MD1  | MD2  | MD3  | MD4  | MD5  | CI1  | CI2  | CI3  | CI4  | CI5 | EI1 | EI2 | EI3 | EI4 | EI5 |
|------|------|------|------|------|------|------|------|------|------|------|------|------|------|------|------|------|------|-----|-----|-----|-----|-----|-----|
| EX1  | 1.0  |      |      |      |      |      |      |      |      |      |      |      |      |      |      |      |      |     |     |     |     |     |     |
| EX2  | .01  | 1.0  |      |      |      |      |      |      |      |      |      |      |      |      |      |      |      |     |     |     |     |     |     |
| EX3  | .09  | .09  | 1.0  |      |      |      |      |      |      |      |      |      |      |      |      |      |      |     |     |     |     |     |     |
| EX4  | .13  | .19  | .23  | 1.0  |      |      |      |      |      |      |      |      |      |      |      |      |      |     |     |     |     |     |     |
| EX5  | .10  | -.08 | .25  | .05  | 1.0  |      |      |      |      |      |      |      |      |      |      |      |      |     |     |     |     |     |     |
| EX6  | -.06 | -.13 | .03  | .01  | .12  | 1.0  |      |      |      |      |      |      |      |      |      |      |      |     |     |     |     |     |     |
| EX7  | -.02 | -.05 | .19  | .13  | .10  | .21  | 1.0  |      |      |      |      |      |      |      |      |      |      |     |     |     |     |     |     |
| EX8  | .22  | .09  | .28  | .13  | .17  | -.03 | .18  | 1.0  |      |      |      |      |      |      |      |      |      |     |     |     |     |     |     |
| MD1  | .03  | -.16 | -.09 | -.10 | .19  | -.01 | -.05 | -.03 | 1.0  |      |      |      |      |      |      |      |      |     |     |     |     |     |     |
| MD2  | -.08 | -.11 | -.14 | -.13 | -.06 | -.04 | -.09 | -.10 | .14  | 1.0  |      |      |      |      |      |      |      |     |     |     |     |     |     |
| MD3  | -.05 | -.08 | -.12 | -.09 | .03  | -.13 | -.14 | -.11 | .29  | .01  | 1.0  |      |      |      |      |      |      |     |     |     |     |     |     |
| MD4  | -.10 | -.11 | -.14 | -.07 | -.05 | -.10 | -.21 | -.20 | .16  | .09  | .29  | 1.0  |      |      |      |      |      |     |     |     |     |     |     |
| MD5  | -.12 | -.09 | -.12 | -.12 | -.06 | -.11 | -.15 | -.18 | .13  | .15  | .09  | .23  | 1.0  |      |      |      |      |     |     |     |     |     |     |
| CI1  | -.09 | -.17 | -.19 | -.23 | -.15 | .01  | -.10 | -.15 | -.15 | -.05 | -.11 | -.09 | -.02 | 1.0  |      |      |      |     |     |     |     |     |     |
| CI2  | -.15 | -.16 | -.17 | -.15 | -.16 | .02  | -.09 | -.11 | -.13 | -.09 | -.08 | -.12 | -.07 | .48  | 1.0  |      |      |     |     |     |     |     |     |
| CI3  | -.13 | -.16 | -.17 | -.16 | -.18 | .00  | -.08 | -.15 | -.20 | -.08 | -.14 | -.13 | -.13 | .31  | .36  | 1.0  |      |     |     |     |     |     |     |
| CI4  | -.16 | -.18 | -.16 | -.21 | -.17 | .01  | -.09 | -.18 | -.16 | -.15 | -.13 | -.11 | -.10 | .42  | .47  | .56  | 1.0  |     |     |     |     |     |     |
| CI5  | -.15 | -.08 | -.25 | -.21 | -.22 | -.05 | -.16 | -.28 | -.15 | -.05 | -.07 | -.06 | -.07 | .14  | .17  | .31  | .30  | 1.0 |     |     |     |     |     |
| EI1  | -.15 | -.08 | -.20 | -.14 | -.26 | -.16 | -.16 | -.22 | -.16 | -.04 | -.06 | -.04 | -.02 | -.07 | -.01 | -.12 | .00  | .13 | 1.0 |     |     |     |     |
| EI2  | -.12 | -.13 | -.18 | -.19 | -.20 | -.05 | -.17 | -.19 | -.13 | -.07 | -.05 | .01  | -.09 | -.06 | -.06 | -.08 | -.04 | .04 | .38 | 1.0 |     |     |     |
| EI3  | -.15 | -.08 | -.16 | -.16 | -.17 | -.21 | -.16 | -.21 | -.17 | -.12 | -.04 | -.05 | .03  | -.06 | -.09 | -.06 | -.07 | .04 | .23 | .22 | 1.0 |     |     |
| EI4  | -.07 | -.14 | -.13 | -.10 | -.16 | -.04 | -.09 | -.18 | -.11 | -.07 | -.04 | -.05 | -.07 | -.09 | -.18 | -.13 | -.09 | .01 | .23 | .32 | .20 | 1.0 |     |

|            |       |       |       |       |       |       |       |       |       |      |       |       |       |       |       |       |       |      |      |      |      |      |     |
|------------|-------|-------|-------|-------|-------|-------|-------|-------|-------|------|-------|-------|-------|-------|-------|-------|-------|------|------|------|------|------|-----|
| <b>EI5</b> | -0.13 | -0.08 | -0.21 | -0.14 | -0.25 | -0.13 | -0.16 | -0.15 | -0.14 | 0.02 | -0.09 | -0.04 | -0.02 | -0.14 | -0.17 | -0.11 | -0.19 | 0.06 | 0.34 | 0.24 | 0.33 | 0.34 | 1.0 |
|------------|-------|-------|-------|-------|-------|-------|-------|-------|-------|------|-------|-------|-------|-------|-------|-------|-------|------|------|------|------|------|-----|
